# Supplementary material
Source: PubMed Central journal article supplement (PMC4426213)
Supplement: NIHMS643012-supplement-01.pdf [file NIHMS643012-supplement-01.pdf]

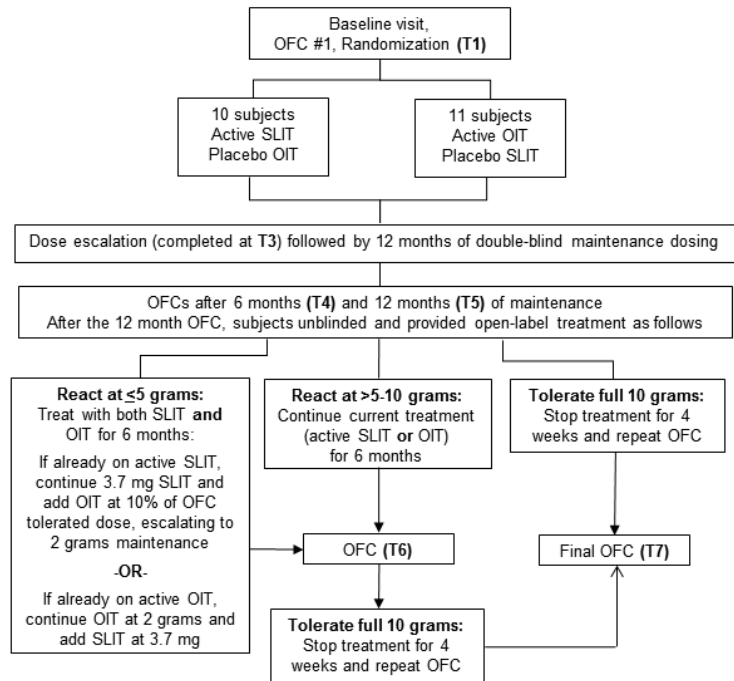

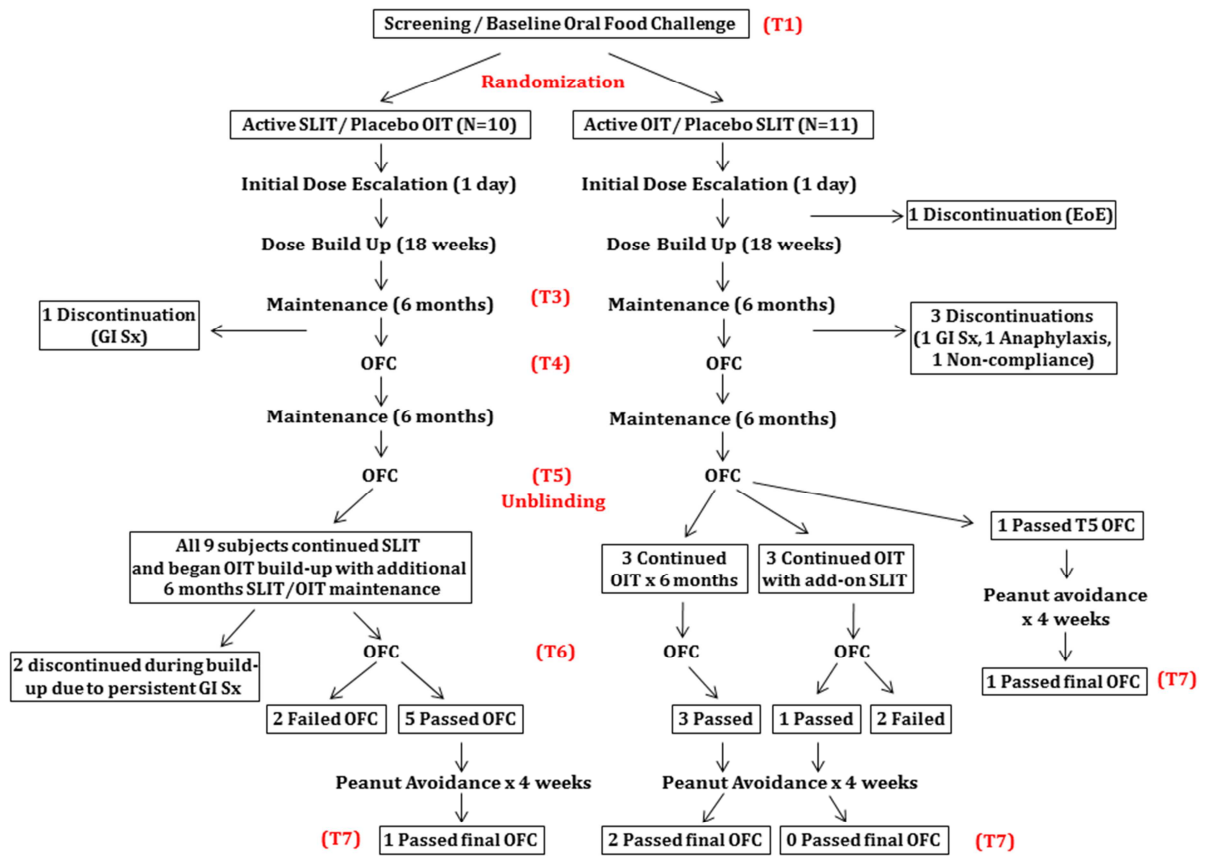

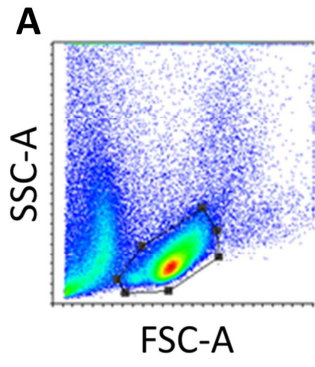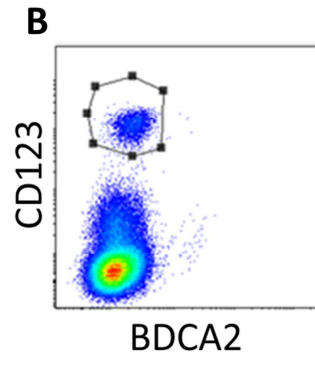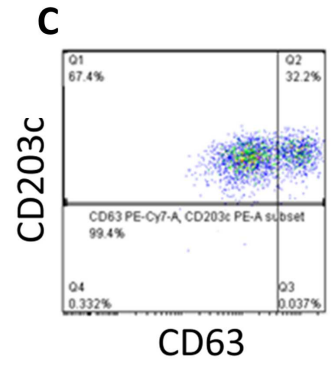

0.1 ng/ml peanut

1 ng/ml peanut

10 ng/ml peanut

CD203c MFI

**A**

**B**

**C**

OIT

SLIT

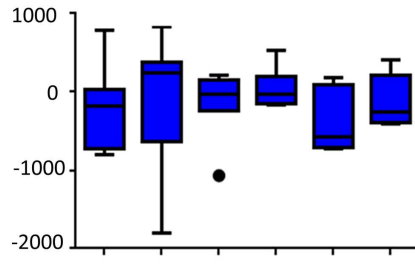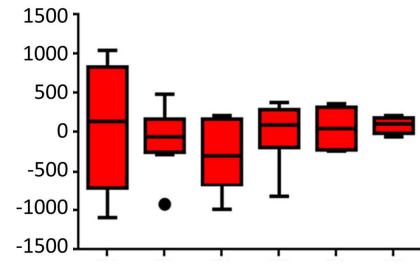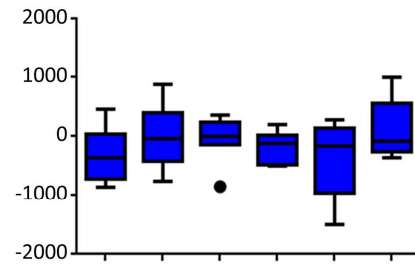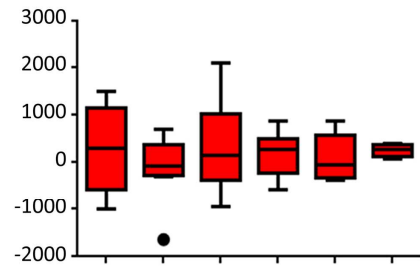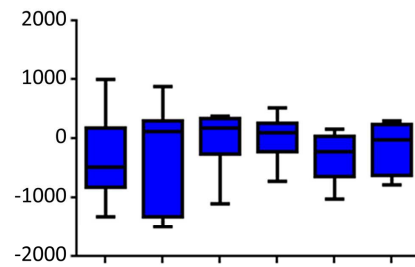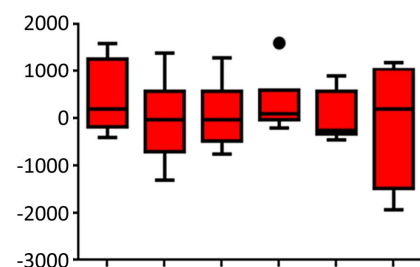

T1 T3 T4 T5 T6 T7

T1 T3 T4 T5 T6 T7

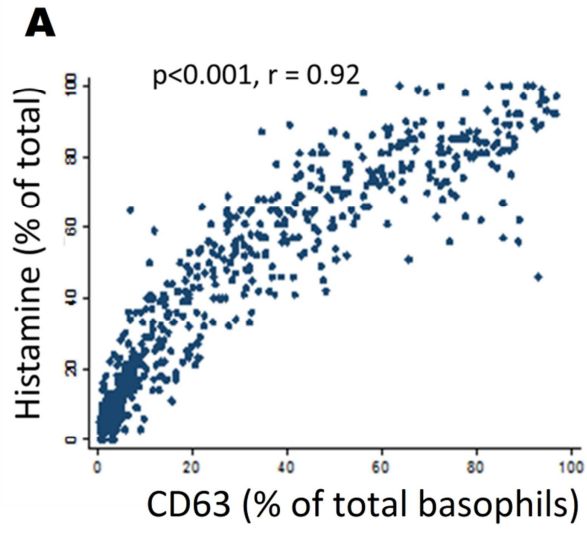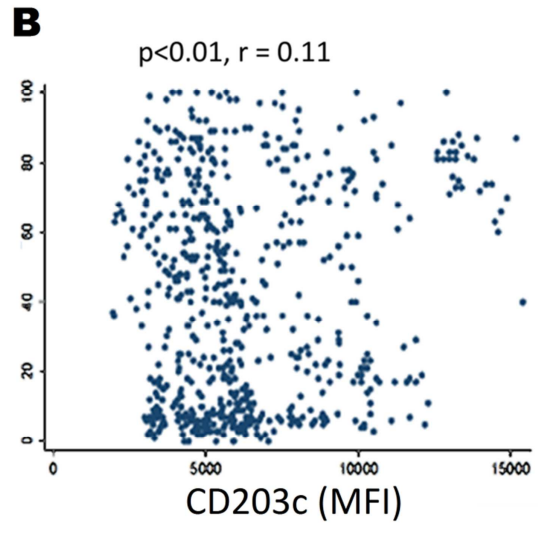

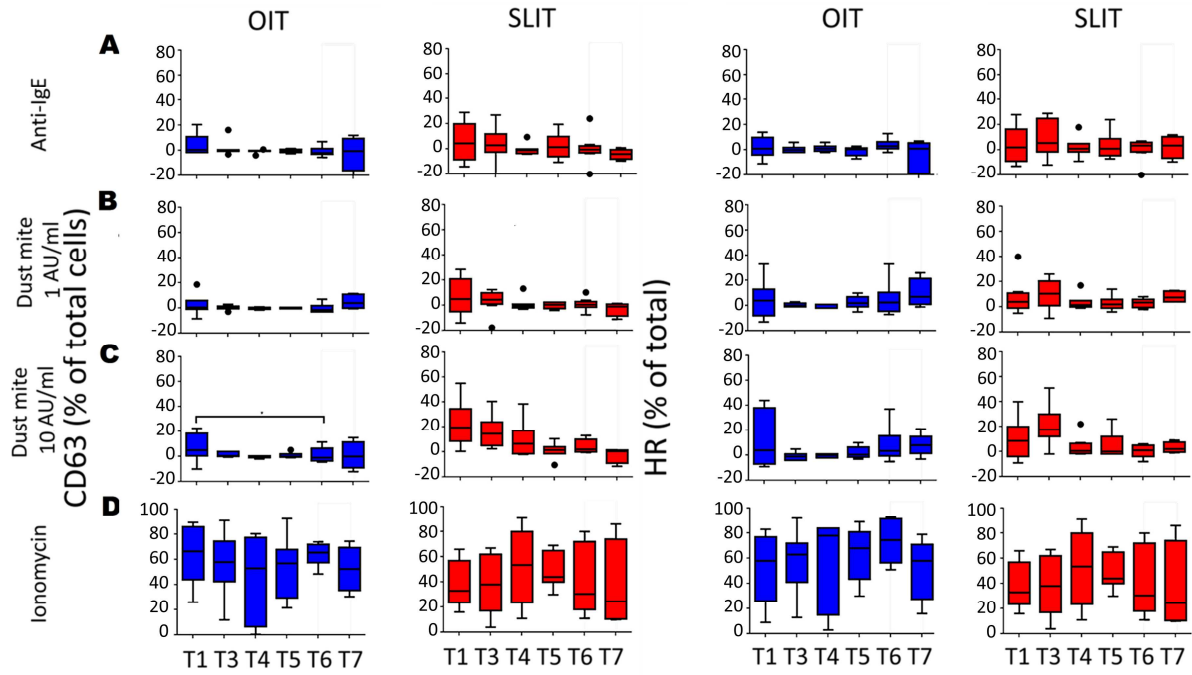

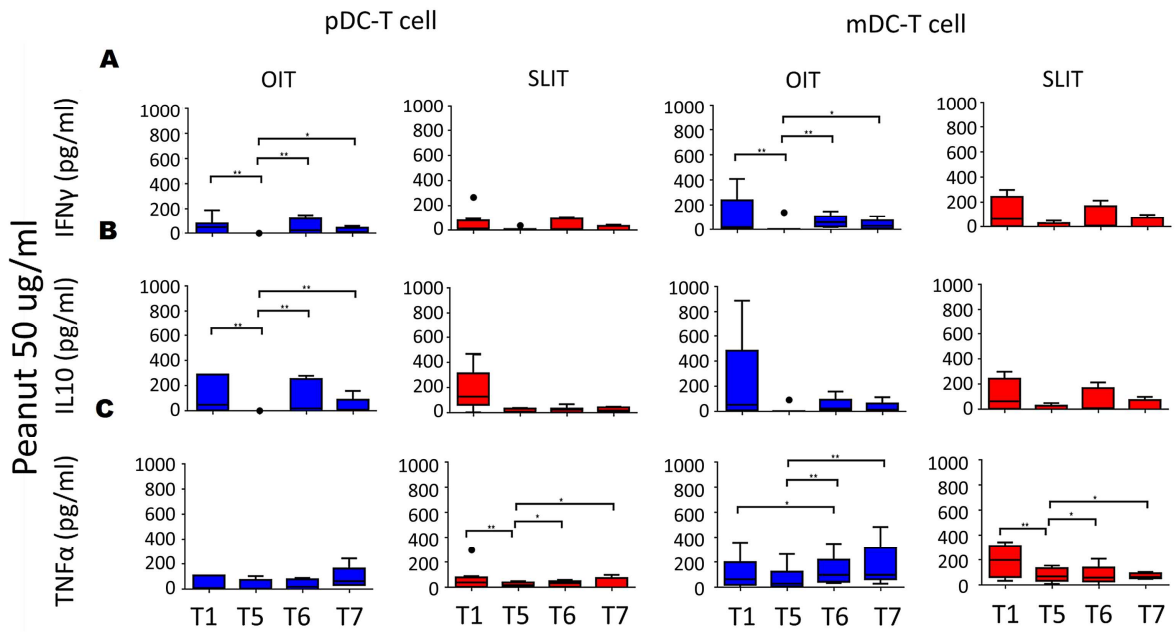

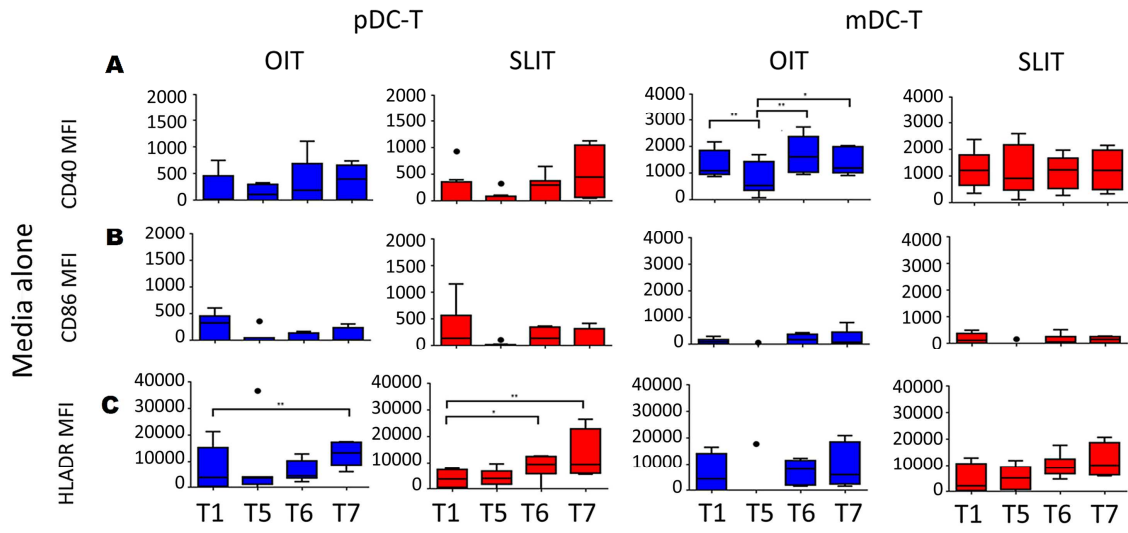



10 ng/ml peanut      1 ng/ml peanut      0.1 ng/ml peanut

CD63(% of total basophils)

**A**

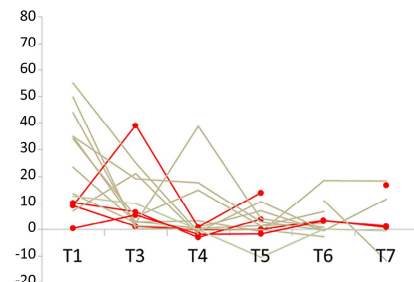

**B**

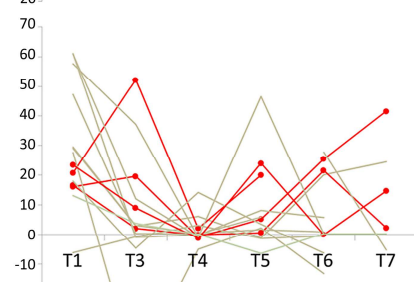

**C**

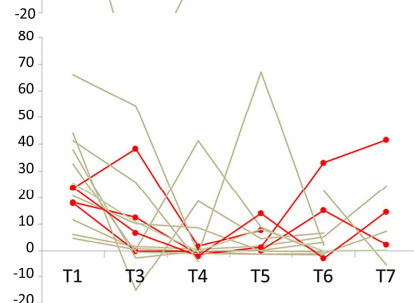

IL4(% of total basophils)

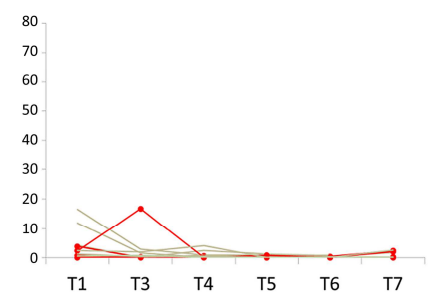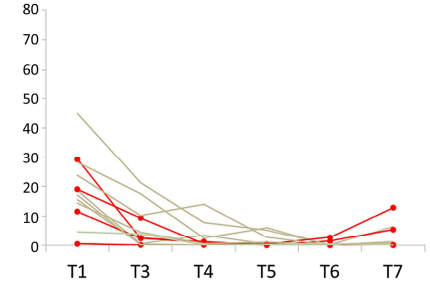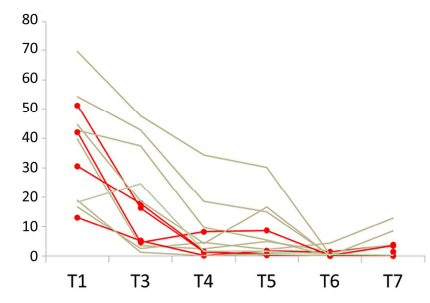

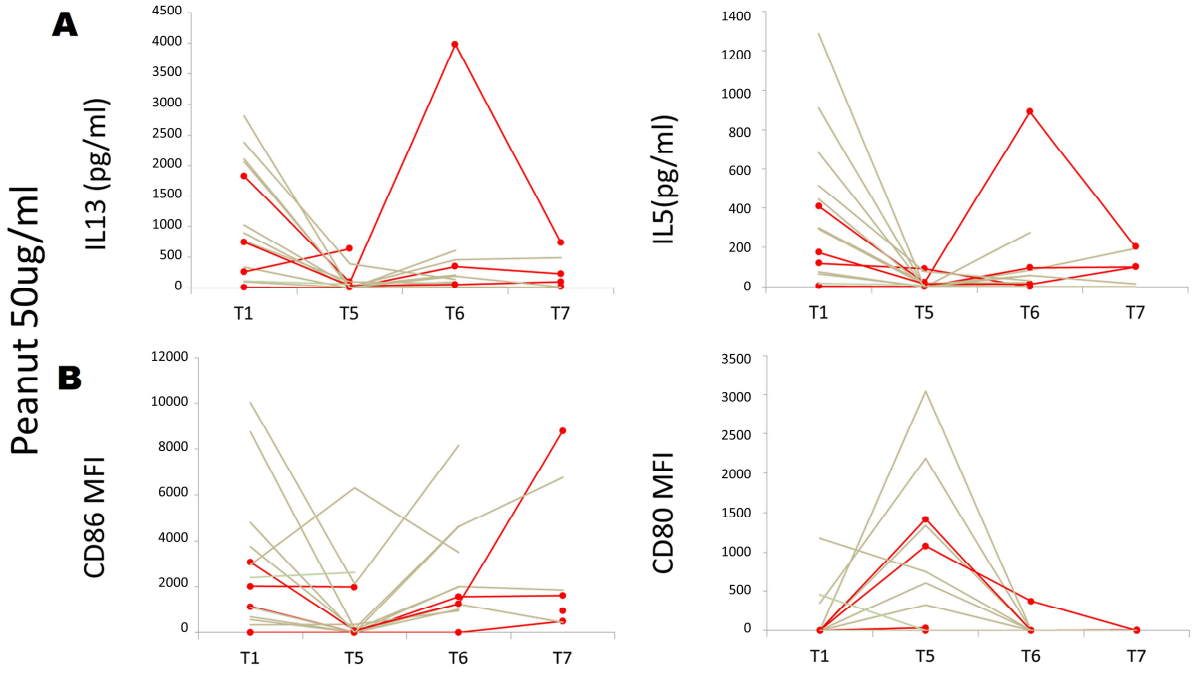

Supplementary Figure legends:

**Suppl. Fig 1.** Flowchart summarizing the clinical study protocol for the subjects from randomization to final food challenge.

**Suppl. Fig 2.** CONSORT flow diagram detailing the progress of participants throughout the clinical trial.

**Suppl. Fig 3.** Flow cytometry gating strategy for CD63 and CD203c analysis. An initial gate was drawn to select small granular cells via SSC and FSC (**A**). Doublets were excluded (not shown). Basophils were then identified as CD123<sup>+</sup> and BDCA2<sup>-</sup> (**B**) and then CD63<sup>hi</sup> vs. CD63<sup>low</sup> cells were defined. The mean fluorescence intensity (MFI) for CD203c was determined on all basophils.

**Suppl. Fig 4.** Effect of OIT or SLIT on CD203c mean fluorescence intensity (MFI). CD203c expression was measured in subjects undergoing OIT (left panels) and SLIT (right panels) for peanut at three doses: 0.1ng/ml (**A**), 1ng/ml (**B**) and 10ng/ml (**C**). T1-T7 correspond to timepoints blood was collected. OIT: N=7 at T1-T5, 5 at T6, and 4 at T7; SLIT: N=8 at T1-T4, 7 at T5, 8 at T6 and 4 at T7. \* p<0.05; \*\* p<0.01

**Suppl. Fig 5.** Correlation between basophil histamine release (HR) and CD63 expression or CD203c mean fluorescence intensity (MFI). Generalized estimating equations were used to adjust for independent variables of time and subject, while r values were obtained via simple regression.

**Suppl. Fig 6.** Effect of OIT and SLIT on basophil reactivity in response to IgE-dependent and – independent stimuli. Stimulated CD63 expression and histamine release (HR) in basophil-enriched suspensions from subjects receiving OIT and SLIT in response to anti-IgE (**A**), dust mite at 1AU/ml (**B**) and 10AU/ml (**C**), and ionomycin (**D**). T1-T7 correspond to timepoints blood was collected. OIT: N=7 at T1-T5, 5 at T6, and 4 at T7; SLIT: N=8 at T1-T4, 7 at T5, 8 at T6 and 4 at T7. \* p<0.05; \*\* p<0.01

**Suppl. Fig 7.** Effect of peanut OIT and SLIT on cytokine responses in DC-T cell co-cultures. IFN- $\gamma$  (**A**), IL-10 (**B**), and TNF- $\alpha$  (**C**) were measured in supernatants from co-cultures of pDCs or mDCs with autologous CD4<sup>+</sup> T cells stimulated with 50 ug/ml crude peanut extract. Spontaneous cytokine secretion, as measured in media alone, was subtracted to obtain allergen-induced values. T1-T7 correspond to timepoints blood was collected. OIT: N=7 at T1-T5, 5 at T6, and 4 at T7; SLIT: N=8 at T1-T4, 7 at T5, 8 at T6 and 4 at T7.. \* p<0.05; \*\* p<0.01.

**Suppl. Fig 8.** Effect of peanut OIT and SLIT on DC expression of co-stimulatory molecules and HLA-DR when cultured in media alone. Mean fluorescence intensity (MFI) of CD40 (**A**), CD86 (**B**) and HLA-DR (**C**) was measured on pDCs or mDCs following co-culture with CD4<sup>+</sup> T cells stimulated with media alone. T1-T7 correspond to timepoints blood was collected. OIT: N=7 at T1-T5, 5 at T6, and 4 at T7; SLIT: N=8 at T1-T4, 7 at T5, 8 at T6 and 4 at T7. \* p<0.05; \*\* p<0.01

**Suppl. Fig 9.** Plot of individual subject basophil CD63 and IL-4 responses to peanut. Basophil-enriched suspensions (CD63) or whole blood (IL-4) was stimulated with crude peanut extract at 0.1 ng/ml (**A**), 1 ng/ml (**B**), and 10ng/ml (**C**). Spontaneous CD63 expression in media alone was subtracted to obtain stimulated values. All SLIT and OIT subjects are shown. Red lines represent patients achieving sustained unresponsiveness. T1-T7 correspond to timepoints blood was collected.

**Suppl. Fig 10.** Plot of individual subject data from myeloid dendritic cell (mDC) mechanistic outcomes. Peanut-induced IL-13 and IL-5 expression in mDC-T cell co-cultures (**A**) and CD80 and CD86 expression on mDCs (**B**) are shown. Spontaneous cytokine secretion, as measured in media alone, was subtracted to obtain allergen-induced values for cytokines. All SLIT and OIT subjects are shown. Red lines represent patients achieving sustained unresponsiveness. T1-T7 correspond to timepoints blood was collected.
